# Supplementary material for: Proteomics-based insights into mitogen-activated protein kinase inhibitor resistance of cerebral melanoma metastases
Source: PubMed Central journal article supplement (PMC5844114; doi:10.1186/s12014-018-9189-x), 2018-03-09
Supplement: 12014_2018_9189_MOESM5_ESM.pdf [file 12014_2018_9189_MOESM5_ESM.pdf]

Supplementary figure 3: Correlation of proteins (P62937, P61962, Q6FI81, P21266) identified by nearest shrunken centroid and CPL/MUW protein database, including 255 cell cultures, cell states and tissue, leading to a high protein similarity to the resistant melanoma cell line TMF1.

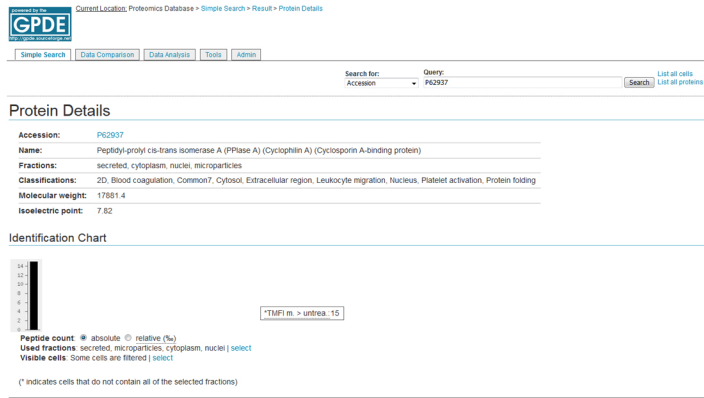

**Identification Details**

This protein was identified in **218 / 255** cells (Show remaining cells)

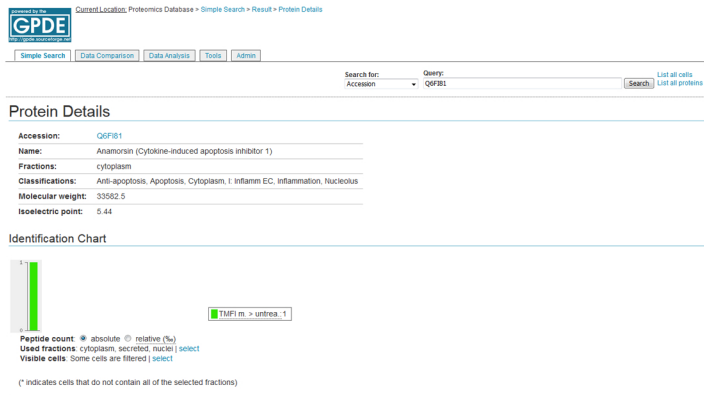

**Identification Details**

This protein was identified in **35 / 255** cells (Show remaining cells)

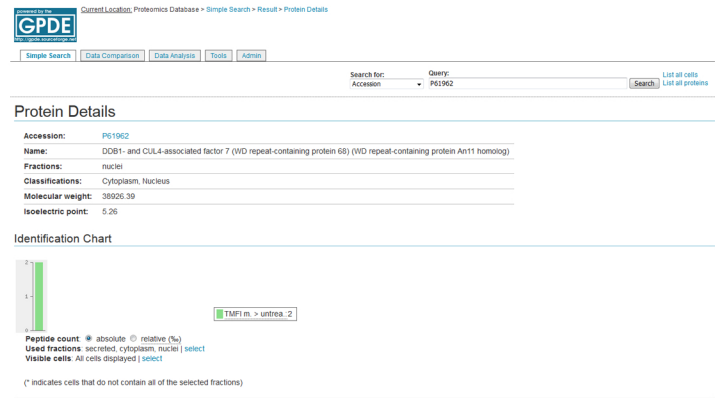

**Identification Details**

This protein was identified in **1 / 255** cell (Show remaining cells)

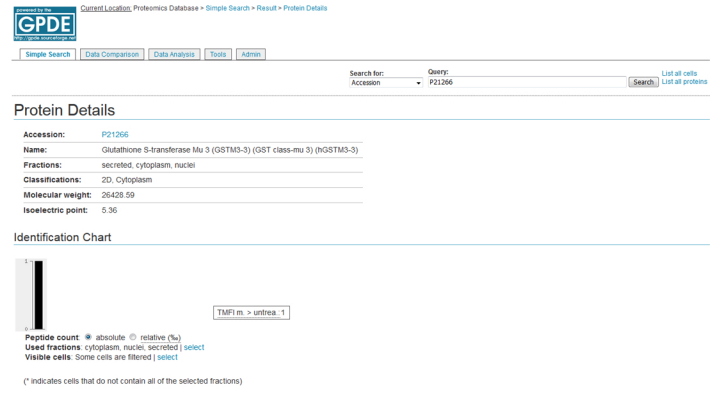

**Identification Details**

This protein was identified in **140 / 255** cells (Show remaining cells)
